# Supplementary material
Source: PubMed Central journal article supplement (PMC4234432)
Supplement: jm501245b_si_001.pdf [file jm501245b_si_001.pdf]

**Radiosynthesis and Evaluation of an  $^{18}\text{F}$ -Labeled Positron Emission Tomography (PET) Radioligand for Metabotropic Glutamate Receptor Subtype 4 (mGlu<sub>4</sub>)**

Kun-Eek Kil, Pekka Poutiainen, Zhaoda Zhang, Aijun Zhu, Ji-Kyung Choi, Kimmo Jokivarsi, Anna-Liisa Brownell\*

Athinoula A. Martinos Center for Biomedical Imaging, Department of Radiology, Massachusetts General Hospital, Charlestown, Massachusetts 02129, United States

**Supporting Information**

|                                                                                                               |    |
|---------------------------------------------------------------------------------------------------------------|----|
| A. Chromatography of [ $^3\text{H}$ ]1 Radiosynthesis.....                                                    | S2 |
| B. In Vitro Selectivity of 3 to mGlu <sub>1</sub> , mGlu <sub>5</sub> and mGlu <sub>8</sub> .....             | S2 |
| C. UV and Radioactivity Traces of the Radiolabeling Reaction Mixture by the Semi-Preparative HPLC.....        | S3 |
| D. Analysis of [ $^{18}\text{F}$ ]3 Formulated in 10% Ethanol Solution in Saline.....                         | S4 |
| E. Stability Test of 3 in the Neutral Media.....                                                              | S5 |
| F. Analysis of [ $^{18}\text{F}$ ]3 Formulated with 10% Ethanol Solution in 0.1 M Citrate Buffer (pH 4) ..... | S6 |
| References.....                                                                                               | S7 |

### A. Chromatography of [<sup>3</sup>H]1 Radiosynthesis

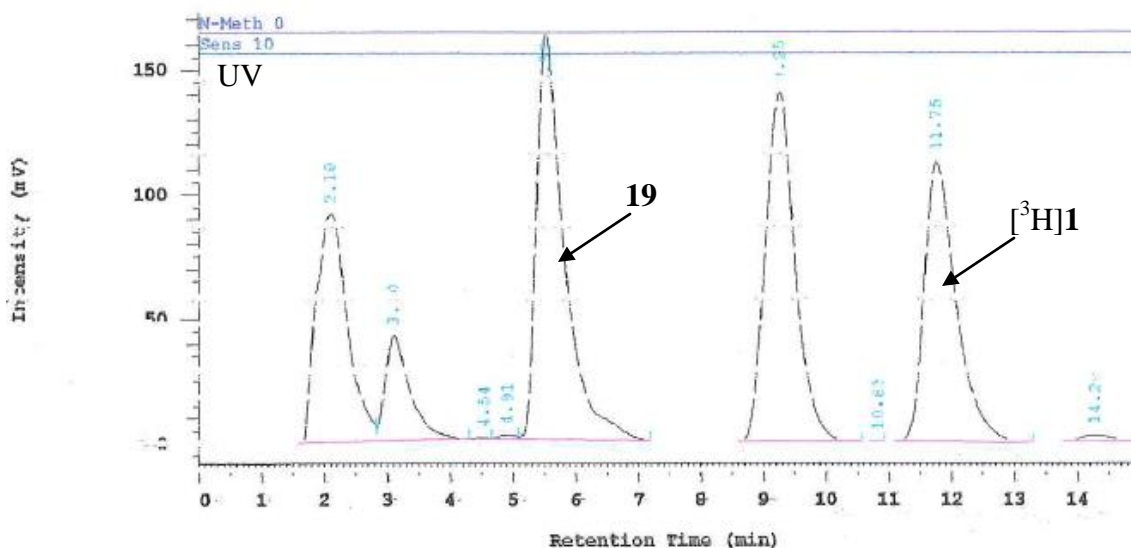

Gemini-NX C<sub>18</sub> semipreparative column (250 mm × 10 mm, 5 μm)

55% Acetonitrile / 45% 0.1 M ammonium formate solution

4.0 ml/min, 254 nm

### B. In Vitro Selectivity of **3** to mGlu<sub>1</sub>, mGlu<sub>5</sub> and mGlu<sub>8</sub>.

| Functional Assay: 10 μM |           | mGluR1a      |                 | mGluR5       |                 | mGluR8       |                 |
|-------------------------|-----------|--------------|-----------------|--------------|-----------------|--------------|-----------------|
| Comp#                   | Structure | Agonist-%MAX | Antagonist-%INH | Agonist-%MAX | Antagonist-%INH | Agonist-%MAX | Antagonist-%INH |
| 3                       |           | 0            | 15              | -13          | 14              | 33           | -44             |

Functional assays were performed using a single concentration (10 μM) of **3** to determine agonist or antagonist activity.<sup>1,2</sup> The tests were carried out by the NIMH PDSP program at the University of North Carolina at Chapel Hill.

### C. UV and Radioactivity Traces of the Radiolabeling Reaction Mixture by the Semi-Preparative HPLC

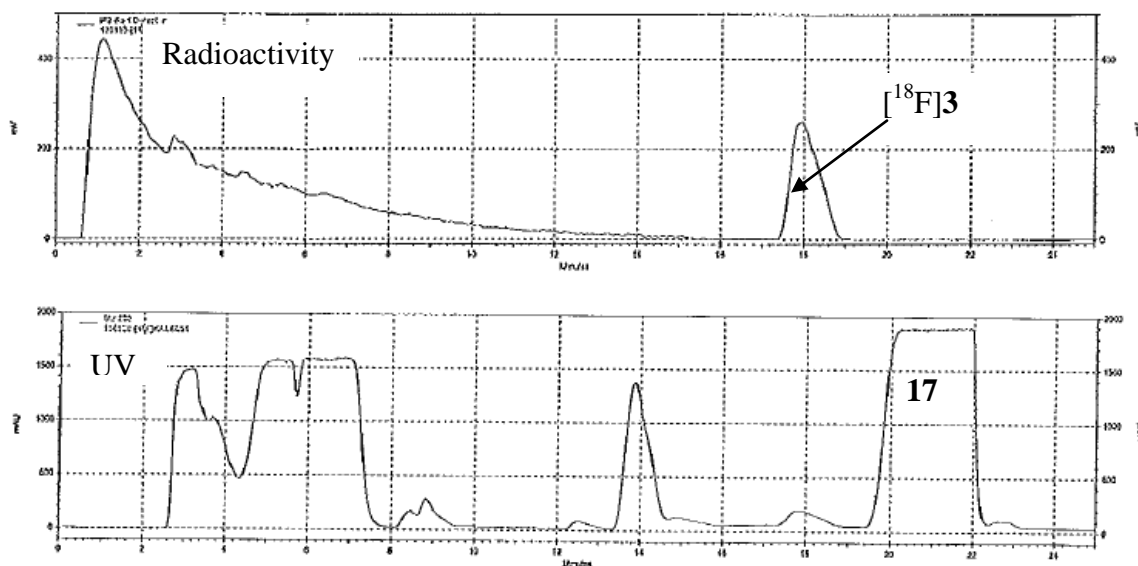

Eclipse XDB-Phenyl semipreparative column (250 mm  $\times$  10 mm, 5  $\mu\text{m}$ )

0.1% formic acid solution of water and acetonitrile (52:48)

Flow rate: 4 ml/min

### D. Analysis of [ $^{18}\text{F}$ ]3 Formulated in 10% Ethanol Solution in Saline.

(a)

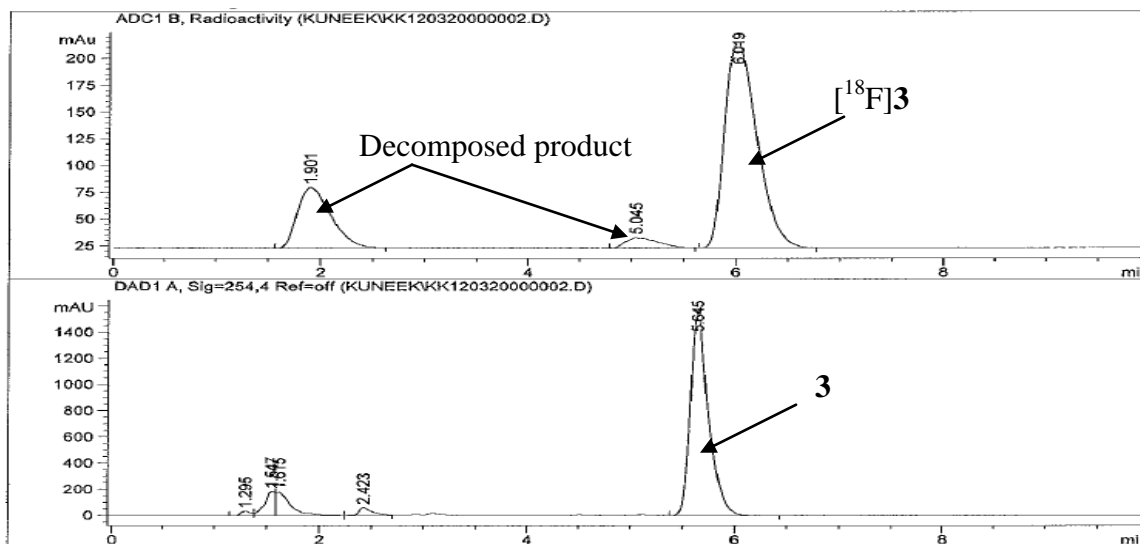

(b)

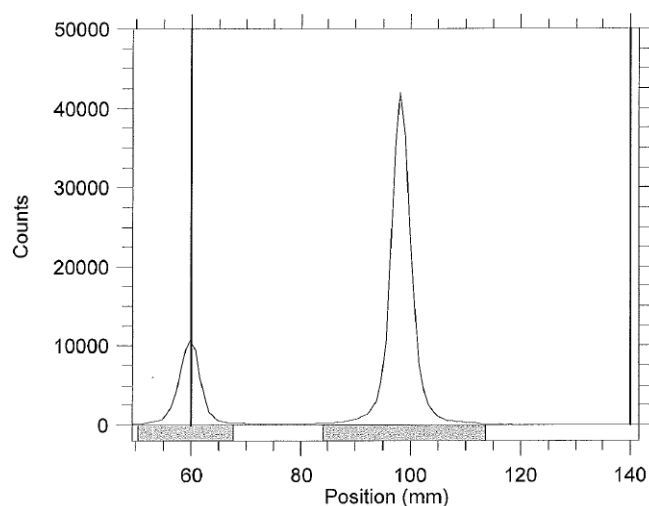

| Reg     | (mm)<br>Start | (mm)<br>Stop | (mm)<br>Centroid | RF     | Region<br>Counts | Region<br>CPM | % of<br>Total | % of<br>ROI |
|---------|---------------|--------------|------------------|--------|------------------|---------------|---------------|-------------|
| Rgn 1   | 50.3          | 67.6         | 59.6             | -0.005 | 59756.0          | 59756.0       | 20.77         | 21.14       |
| Rgn 2   | 84.1          | 113.7        | 98.2             | 0.477  | 222855.0         | 222855.0      | 77.46         | 78.86       |
| 2 Peaks |               |              |                  |        | 282611.0         | 282611.0      | 98.24         | 100.00      |

(a) Analytical HPLC profile of [ $^{18}\text{F}$ ]3 co-injected with nonradioactive standard **3** by a neutral method. (b) The radio-TLC result obtained after the radioactive aliquot was formulated in 10% ethanol in saline, cospotted with nonradioactive **3** on TLC and developed with a solution of ethyl acetate and hexane (1:1).

## E. Stability Test of 3 in the Neutral Media

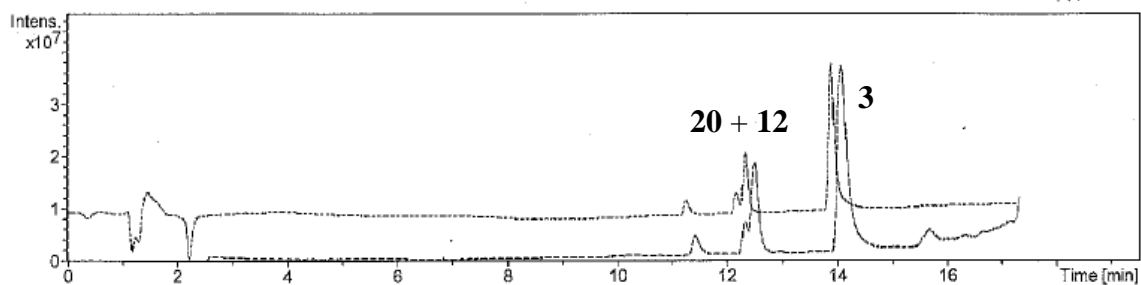

--- KK0322201200006.D: TIC +All MS

----- KK0322201200006.D: UV Chromatogram, 252-256 nm

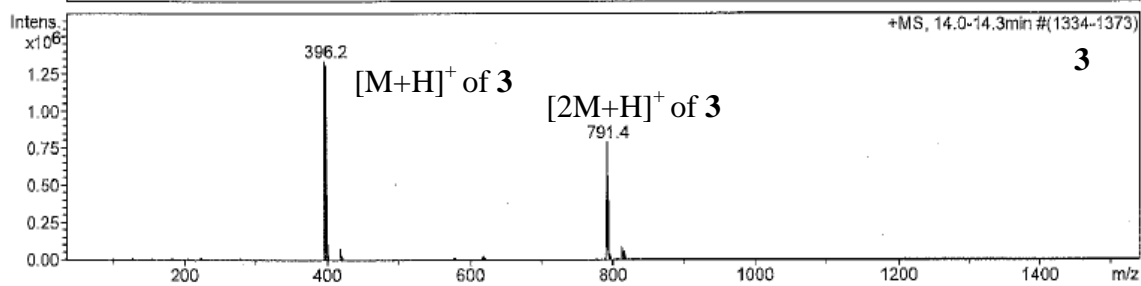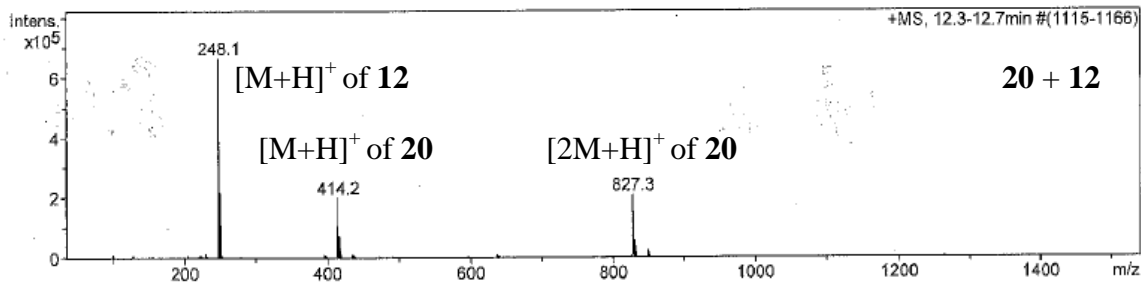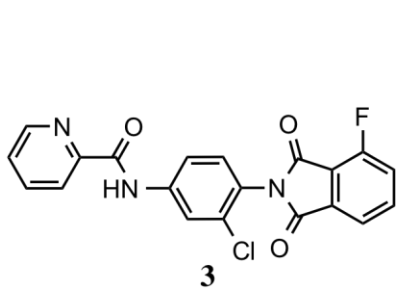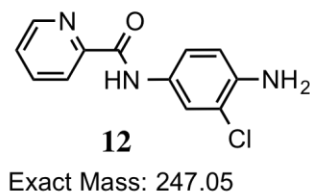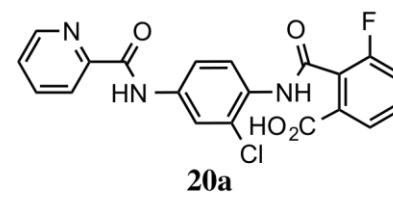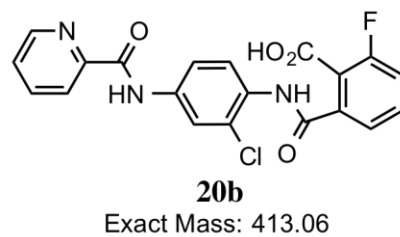

### F. Analysis of [ $^{18}\text{F}$ ]3 Formulated with 10% Ethanol Solution in 0.1 M Citrate Buffer (pH 4).

(a)

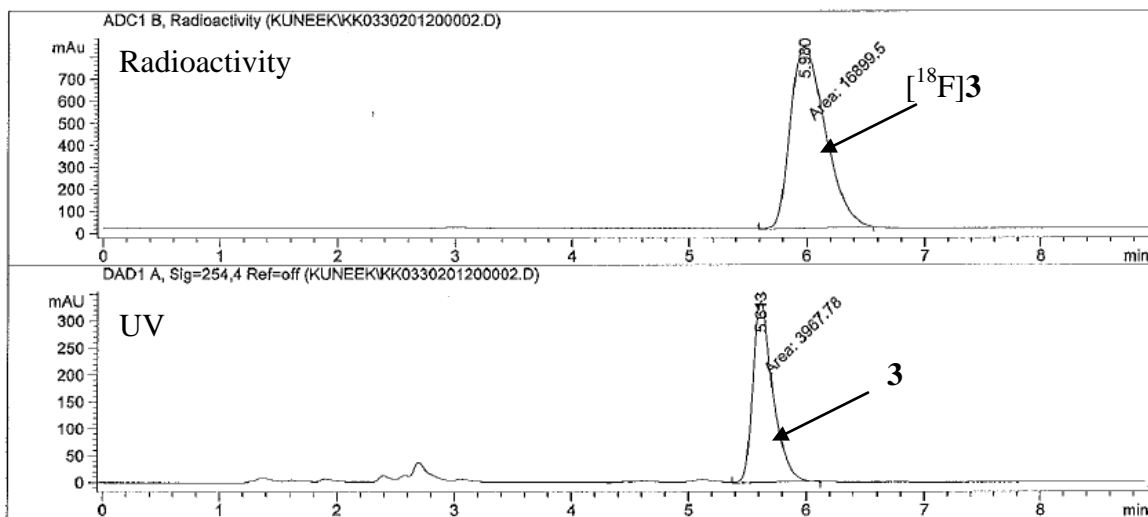

(b)

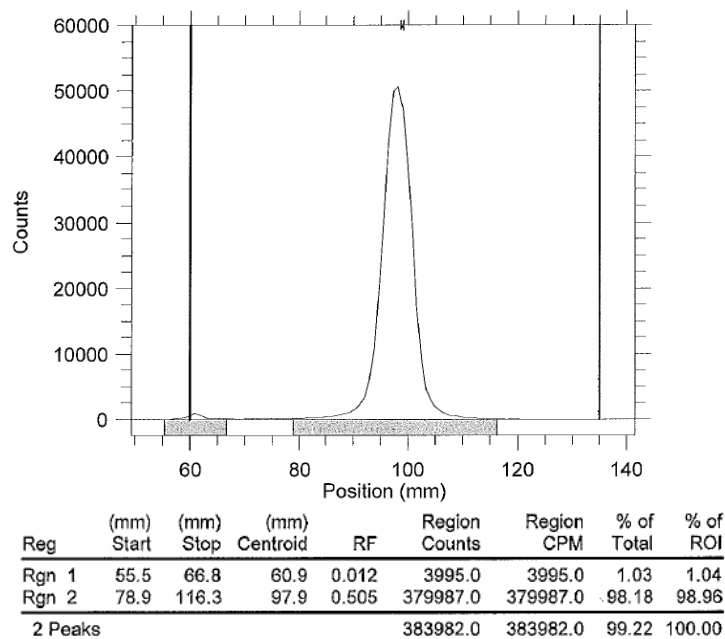

(a) Analytical HPLC profile of [ $^{18}\text{F}$ ]3 co-injected with nonradioactive standard 3 by an acidic method. (b) The radio-TLC result obtained after the radioactive aliquot was formulated in a 0.1 M citrate buffer solution (pH 4) with 10% ethanol, cospotted with the nonradioactive 3 on TLC and developed with a solution of ethyl acetate and hexane (1:1).

**References**

- (1) Shi, Q.; Savage, J. E.; Hufeisen, S. J.; Rauser, L.; Grajkowska, E.; Ernsberger, P.; Wroblewski, J. T.; Nadeau, J. H.; Roth, B. L. L-Homocysteine sulfinic acid and other acidic homocysteine derivatives are potent and selective metabotropic glutamate receptor agonists. *J. Pharmacol. Exp. Ther.* **2003**, *305*, 131-142.
- (2) Roth, B. L.: National Institute of Mental Health Psychoactive Drug Screening Program Assay Protocol Book
